# Supplementary material for: MSMEG_2731, an Uncharacterized Nucleic Acid Binding Protein from Mycobacterium smegmatis, Physically Interacts with RPS1
Source: PLoS One. 2012 May 9;7(5):e36666. doi: 10.1371/journal.pone.0036666 (PMC3348880; doi:10.1371/journal.pone.0036666)
Supplement: Excel S1 — Mass Spectrometry results analysis. All MS/MS data were searched against a Mycobacterium smegmatis MC-155 protein database (2009-6-23, 16221 entries) downloaded from the NCBI database using the SEQUEST (v.28) program (Thermo, USA). All searches were performed using a precursor mass tolerance of 3 Da calculated using average isotopic masses. Variable modification was set for methionine with the addition of 15.999 Da to represent methionine oxidation; static modification was set for cysteine with the addition of 57.052 Da to represent cysteine carboxyamidation. A fragment ion mass tolerance of 1Da was used. Enzyme cleavage specificity was set to trypsin and no more than two missed cleavages were allowed. The SEQUEST outputs were then analyzed using the commercial software Thermo Electron BioWorks (Rev.3.3.1 sp1). The filter settings for peptides were as follows –distinct peptide, Xcorr ≥1.9 (z = 1), 2.7 (z = 2), 3.75 (z = 3), Sp≥500, Rsp≤5, at least two distinct peptides per protein. (XLS) [file pone.0036666.s007.xls]

## Sheet: __Ibp-102_share_ymz_A1.RAW
	Reference						P (pro)	Sf	Score	Coverage	MW	Accession	Peptide (Hits)
	Scan(s)	Peptide	MH+	DeltaM	z	Type	P (pep)	Sf	XC	DeltaCn	Sp	RSp	Ions	Count
1	gi|118472813|ref|YP_888124.1| 30S ribosomal protein S1 [Mycobacterium smegmatis str. MC2 155]						8.32667e-14	17.3058	180.288	44.9	53315.4	118472813	18 (18 0 0 0 0)
	12188	K.GGLILDIGLR.G	1027.24	0.0561683	2	CID	0.00541157	0.939054	3.35175	0.282266	1306.93	2	15/18	1
	8504	R.SEFLNQLQK.G	1107.24	-0.342088	2	CID	0.000502959	0.927919	2.84677	0.448892	975.158	1	13/16	1
	6770	R.THAIGQIVPGK.V	1121.31	-0.0580741	2	CID	6.67129e-08	0.953745	3.27642	0.554363	1063.59	1	17/20	1
	7214	R.VRDLQPYIGK.E	1189.39	0.0106543	2	CID	5.25581e-05	0.938167	2.83866	0.4563	1107.98	1	15/18	1
	12266	R.GFLPASLVEMR.R	1220.47	0.88261	2	CID	2.47559e-06	0.958643	3.34027	0.645927	838.559	1	18/20	1
	11073	R.GFLPASLVEM*R.R	1236.46	2.08313	2	CID	0.00359899	0.925727	2.71161	0.395353	978.288	1	17/20	1
	8241	R.AWLEQTQSEVR.S	1347.46	-0.0407612	2	CID	3.48473e-05	0.973693	3.98372	0.577442	1745.4	1	17/20	1
	7599	R.RAWLEQTQSEVR.S	1503.64	1.63116	2	CID	3.30208e-07	0.956392	3.85983	0.541162	922.91	1	17/22	1
	10214	K.VDRDEVLLDIGYK.T	1535.72	-0.197393	2	CID	1.6252e-08	0.965281	3.86834	0.584341	1209.57	1	19/24	1
	10304	K.YFNDGDIVEGTIVK.V	1570.72	-0.435418	2	CID	1.7033e-11	0.981271	4.60473	0.707307	1844.13	1	24/26	1
	8002	K.QANEDYTEEFDPSK.Y	1673.67	2.70114	2	CID	1.44519e-05	0.949172	3.51212	0.479139	1198.67	1	18/26	1
	6990	K.FAAAEAEAANAPVSNGSSR.S	1820.9	-0.077424	2	CID	6.41759e-07	0.974119	4.34491	0.627527	1599.02	1	26/36	1
	8708	R.AWGTIEELKEKDEAVK.G	1847.06	-1.05033	2	CID	5.17358e-07	0.976498	4.9321	0.576638	1582.45	1	22/30	1
	9843	R.SEESSGGTLASDAQLAALR.E	1863.96	-0.718154	2	CID	1.32153e-08	0.98298	5.76816	0.71093	1865.53	1	25/36	1
	11624	R.VEEGIEGLVHISELSER.H	1897.08	-1.1676	2	CID	1.44995e-12	0.982349	5.14849	0.721406	2041.71	1	23/32	1
	9554	R.HVEVPDQVVQVGDDAMVK.V	1966.21	-0.736268	2	CID	8.32667e-14	0.98565	5.48838	0.74409	2433.48	1	28/34	1
	8752	R.HVEVPDQVVQVGDDAM*VK.V	1982.2	-0.679669	2	CID	3.00436e-07	0.969092	4.36762	0.712906	1097.75	1	22/34	1
	13463	K.HDVDPNEVVSVGDEVEALVLTK.E	2365.58	-1.29897	3	CID	1.92614e-05	0.966083	4.55199	0.495238	1905.76	1	35/84	1
2	gi|118174100|gb|ABK74996.1| 30S ribosomal protein S1 [Mycobacterium smegmatis str. MC2 155]						8.32667e-14	17.3058	180.288		53315.4	118174100	18 (18 0 0 0 0)
3	gi|118470103|ref|YP_887064.1| ATPase involved in DNA repair [Mycobacterium smegmatis str. MC2 155]						1.22125e-14	16.1394	170.286	48.2	49734.8	118470103	17 (17 0 0 0 0)
	6632	K.IDLSDNEAAR.A	1104.15	-0.497725	2	CID	0.0172443	0.953363	2.89192	0.416713	1382.72	1	17/18	1
	8266	K.AAQDTFFSAR.N	1114.19	1.01773	2	CID	2.80386e-05	0.904825	2.84151	0.40392	791.237	1	14/18	1
	9008	K.DVDDALWQR.F	1118.18	0.135163	2	CID	0.00284825	0.931937	3.1925	0.252868	1141	1	14/16	1
	9686	R.LREILDEWR.T	1230.4	-0.664466	2	CID	2.27438e-05	0.882674	2.6416	0.386875	732.667	1	12/16	1
	9170	R.QWAEAAAESLEK.R	1333.43	0.836189	2	CID	1.2782e-08	0.934751	2.9107	0.586948	652.876	1	18/22	1
	6027	R.GADMTTSEPGGATPK.P	1420.53	-1.00778	2	CID	6.18303e-05	0.967808	3.55208	0.612341	1665.63	1	21/28	1
	6556	R.VAPVVAAAPSSDPHR.F	1474.65	-1.4379	2	CID	4.05961e-07	0.965624	3.65785	0.571226	1434.05	1	22/28	1
	10139	R.YDDLHTEVALLER.R	1574.72	-0.204032	2	CID	0.000366859	0.911411	2.88511	0.548699	699.251	1	16/24	1
	11333	R.VDPDGTVWLITGSGER.V	1702.85	-0.3581	2	CID	7.03437e-12	0.964435	4.02582	0.715663	1032.08	1	20/30	1
	9982	R.LSSILEQADEAAQNER.A	1774.87	0.584135	2	CID	1.32001e-06	0.984317	5.55872	0.567567	2642.3	1	23/30	1
	10312	R.AEALADSTDWGATSAAFR.D	1840.93	0.995679	2	CID	9.93985e-09	0.982584	5.48782	0.693598	1988.26	1	24/34	1
	6345	R.GADMTTSEPGGATPKPTPR.P	1872.05	-0.436807	2	CID	6.19624e-05	0.90996	3.59712	0.564522	608.699	1	18/36	1
	11616	K.EALAAEAEDIAANSTQWK.A	1919.04	0.520751	2	CID	6.91103e-11	0.987237	5.7114	0.656666	3326.86	1	27/34	1
	11061	R.VIGAWQAGDTESAFAHFGR.R	2021.18	-0.611313	2	CID	1.1543e-09	0.957606	3.91843	0.647465	1154.82	1	20/36	1
	10835	R.KEALAAEAEDIAANSTQWK.A	2047.21	0.280699	2	CID	1.22125e-14	0.982452	4.97203	0.704008	2317.91	1	24/36	1
	10509	K.EALLAEAEKIDLSDNEAAR.A	2059.22	-0.953243	2	CID	1.0418e-06	0.949279	4.78188	0.680306	635.158	1	15/36	1
	13392	K.SAAAALAESLPTASVLGDVDALSAR.L	2357.6	0.762434	2	CID	0.00017389	0.969104	5.32303	0.682925	819.212	1	25/48	1
4	gi|118171390|gb|ABK72286.1| ATPase involved in DNA repair [Mycobacterium smegmatis str. MC2 155]						1.22125e-14	16.1394	170.286		49734.8	118171390	17 (17 0 0 0 0)
5	gi|118469915|ref|YP_886856.1| 30S ribosomal protein S2 [Mycobacterium smegmatis str. MC2 155]						2.60036e-11	11.4794	120.23	31.2715	31760.8	118469915	12 (12 0 0 0 0)
	7539	R.VGMPYVNQR.W	1064.24	0.808645	2	CID	5.33929e-05	0.901296	2.60526	0.295399	674.601	1	15/16	2
	8786	K.VIASAVAEGLQAR.A	1285.48	-0.447502	2	CID	6.43231e-08	0.980495	3.97124	0.512037	2889.86	1	21/24	2
	9704	K.VPSAVWVVDTNK.E	1315.5	-0.852805	2	CID	2.20758e-06	0.960126	3.56139	0.597614	1213.64	1	17/22	2
	6524	K.QAQESIAEEATR.V	1333.39	-0.240986	2	CID	2.64411e-06	0.967285	3.66958	0.651631	1051.9	1	20/22	2
	6095	K.KQAQESIAEEATR.V	1461.56	0.751628	2	CID	3.94824e-07	0.974745	3.79262	0.594833	1837.45	1	21/24	2
	8352	K.ELEAMEQTGGFEGR.T	1554.66	0.646244	2	CID	1.69729e-08	0.978863	4.43412	0.588823	1932.92	1	23/26	2
	7053	K.QLLDSGAHFGHQTR.R	1567.69	-0.866645	2	CID	8.06258e-08	0.930226	3.27771	0.633449	510.152	1	18/26	2
	7101	K.ELEAM*EQTGGFEGR.T	1570.66	0.568199	2	CID	6.45774e-08	0.918243	3.29511	0.56036	560.645	1	17/26	2
	11657	R.WLGGMLTNFSTVHK.R	1591.86	-0.307855	2	CID	3.54867e-06	0.948605	3.83308	0.55696	926.978	1	17/26	2
	9130	R.LKELEAMEQTGGFEGR.T	1796	1.53994	2	CID	5.07106e-09	0.978847	4.12586	0.517236	2469.65	1	24/30	2
	7319	R.LKELEAM*EQTGGFEGR.T	1811.99	-0.235496	2	CID	2.31509e-06	0.968707	4.29073	0.666445	1226.56	1	20/30	2
	9806	K.VPSAVWVVDTNKEHIAVGEAR.K	2278.55	-1.39291	3	CID	2.60036e-11	0.971927	4.60956	0.66184	1853.21	1	35/80	2
6	gi|118171202|gb|ABK72098.1| ribosomal protein S2 [Mycobacterium smegmatis str. MC2 155]						2.60036e-11	11.4794	120.23		31760.8	118171202	12 (12 0 0 0 0)
7	gi|209573699|sp|A0QVB8.2|RS2_MYCS2 RecName: Full=30S ribosomal protein S2						2.60036e-11	11.4794	120.23		30107	209573699	12 (12 0 0 0 0)
8	gi|118468039|ref|YP_889939.1| DNA or RNA helicase of superfamily protein II [Mycobacterium smegmatis str. MC2 155]						8.10463e-14	9.35946	100.229	20.7	64743.2	118468039	10 (10 0 0 0 0)
	10166	R.LGLTATLIR.E	958.18	-0.570771	2	CID	0.0254555	0.845409	2.85196	0.189548	639.246	2	13/16	1
	11916	R.ITPLALWNAR.A	1155.37	0.630755	2	CID	6.2609e-05	0.932789	3.12617	0.578435	512.727	1	15/18	1
	7055	R.MLYATSEPDER.Y	1312.43	-0.42703	2	CID	8.74246e-08	0.953965	3.37378	0.589005	1150.54	1	15/20	1
	9790	K.ADGGGAVFYSVVSR.D	1385.51	-0.910284	2	CID	0.000162581	0.96344	4.18342	0.60638	1059.07	1	19/26	1
	10490	R.FLAEQGYGYIIK.D	1402.62	-0.370742	2	CID	2.1316e-08	0.971232	3.5735	0.465701	2017.94	1	19/22	1
	11258	K.AGATTLILVTNTVAGR.Q	1558.81	1.98615	2	CID	2.96551e-05	0.97087	4.58307	0.406037	1774.12	1	22/30	1
	10444	K.TVLLEVDHELAGAAR.A	1594.79	-0.0852065	2	CID	8.57093e-08	0.958055	3.70153	0.566106	1382.88	1	18/28	1
	8220	R.TSLTEDEIGEYSGEK.K	1658.7	-0.326738	2	CID	2.33002e-09	0.969655	4.18317	0.60038	1346.88	1	21/28	1
	7660	R.TSLTEDEIGEYSGEKK.E	1786.87	-0.395893	2	CID	5.76613e-08	0.841335	2.85832	0.49762	578.155	1	15/30	1
	12653	R.AAGHDAEQVVDALVSFSR.Y	1873.02	-0.743077	2	CID	8.10463e-14	0.952708	3.5822	0.653013	1105.71	1	20/34	1
9	gi|118169326|gb|ABK70222.1| DNA or RNA helicase of superfamily protein II [Mycobacterium smegmatis str. MC2 155]						8.10463e-14	9.35946	100.229		64743.2	118169326	10 (10 0 0 0 0)
10	gi|118468301|ref|YP_885905.1| 30S ribosomal protein S4 [Mycobacterium smegmatis str. MC2 155]						6.38884e-08	5.67121	60.2362	34.8	23375.5	118468301	6 (6 0 0 0 0)
	7052	R.ILVHQLPER.A	1105.32	2.0716	2	CID	0.000524474	0.923547	2.69078	0.333992	1075.78	1	14/16	2
	9176	R.VSQYDIIDVK.E	1180.33	-0.114129	2	CID	4.57956e-07	0.942162	3.09901	0.544179	1006.25	1	14/18	2
	9866	R.LGVDLVGGDQSFEK.R	1464.6	0.847066	2	CID	6.38884e-08	0.960042	3.86807	0.56002	1059.23	1	20/26	2
	9155	R.RLGVDLVGGDQSFEK.R	1620.79	-1.19549	2	CID	2.93e-06	0.976929	4.72423	0.53343	1827.28	1	22/28	2
	11534	R.ETAGERPIPSWLQVVGER.Q	2025.25	0.43635	3	CID	0.000473036	0.936168	3.74709	0.481372	1346.85	1	28/68	2
	13896	R.AQIDVPLTEQLIVELYSK.-	2060.38	1.03087	2	CID	1.26526e-05	0.932359	3.67386	0.521867	632.421	1	21/34	2
11	gi|118169588|gb|ABK70484.1| ribosomal protein S4 [Mycobacterium smegmatis str. MC2 155]						6.38884e-08	5.67121	60.2362		23375.5	118169588	6 (6 0 0 0 0)
12	gi|171472975|sp|A0QSL7.1|RS4_MYCS2 RecName: Full=30S ribosomal protein S4						6.38884e-08	5.67121	60.2362		23375.5	171472975	6 (6 0 0 0 0)
13	gi|118469768|ref|YP_885754.1| DNA-directed RNA polymerase subunit beta' [Mycobacterium smegmatis str. MC2 155]						1.0535e-09	5.41434	60.1997	5.8	146512	118469768	6 (6 0 0 0 0)
	9093	R.LVDVSQDVIVR.E	1243.43	0.294028	2	CID	4.28822e-05	0.821163	2.77931	0.247717	619.006	1	14/20	2
	7022	R.LVDLNHAQNIK.S	1265.44	-0.644311	2	CID	1.0535e-09	0.929852	2.94725	0.53509	874.773	1	15/20	2
	6465	R.NIQVQPTEEAR.A	1285.39	-0.0528764	2	CID	0.000439203	0.906813	3.00161	0.472366	736.27	1	14/20	2
	11004	R.FPMIVVAQTVDK.L	1348.64	1.93522	2	CID	5.67785e-05	0.92413	3.20514	0.284679	1243.91	1	16/22	2
	9699	K.LEADLAELEAEGAK.S	1459.58	-0.19982	2	CID	9.18605e-07	0.974801	3.99356	0.588133	1900.51	1	21/26	2
	9354	R.TLATDAVDANGNVIIER.G	1772.94	0.777914	2	CID	0.000476275	0.857579	3.33785	0.351308	640.476	1	17/32	2
14	gi|118171055|gb|ABK71951.1| DNA-directed RNA polymerase, beta' subunit [Mycobacterium smegmatis str. MC2 155]						1.0535e-09	5.41434	60.1997		146512	118171055	6 (6 0 0 0 0)
15	gi|160175509|sp|A0QS66.1|RPOC_MYCS2 RecName: Full=DNA-directed RNA polymerase subunit beta'; Short=RNAP subunit beta'; AltName: Full=Transcriptase subunit beta'; AltName: Full=RNA polymerase subunit beta'						1.0535e-09	5.41434	60.1997		146512	160175509	6 (6 0 0 0 0)
16	gi|118469118|ref|YP_886965.1| translation initiation factor IF-2 [Mycobacterium smegmatis str. MC2 155]						3.09094e-10	3.59278	40.2294	8.4	65926.8	118469118	4 (4 0 0 0 0)
	8564	R.GPVATVLIQR.G	1054.27	0.211263	2	CID	0.0024523	0.788169	2.56848	0.257534	532.493	1	13/18	1
	6849	R.VGDSVVAGDAYGR.V	1266.34	-0.592237	2	CID	0.000101597	0.953804	3.4716	0.649833	943.996	1	18/24	1
	10080	K.EGDVIETYELVEK.A	1524.65	1.05334	2	CID	0.00111097	0.876795	2.80422	0.448516	708.609	1	15/24	1
	9850	R.DNVVVAQNLTVSSLR.R	1615.81	-0.479173	2	CID	3.09094e-10	0.974014	4.58777	0.622552	1528.15	1	20/28	1
17	gi|118170405|gb|ABK71301.1| translation initiation factor IF-2 [Mycobacterium smegmatis str. MC2 155]						3.09094e-10	3.59278	40.2294		65926.8	118170405	4 (4 0 0 0 0)
18	gi|118470088|ref|YP_885820.1| 50S ribosomal protein L4 [Mycobacterium smegmatis str. MC2 155]						1.92171e-08	2.8342	30.2102	19.1	22884.7	118470088	3 (3 0 0 0 0)
	8673	K.TFLGTLTENKK.V	1252.44	-0.722142	2	CID	0.000358573	0.918369	2.66221	0.554975	793.683	1	15/20	2
	6437	R.APQFTGGGTVHGPK.P	1354.5	0.990719	2	CID	1.92171e-08	0.947604	3.01496	0.618061	1232.03	1	18/26	2
	8084	R.IHAVTELVEGQTPSTK.S	1710.91	1.04646	2	CID	8.45026e-06	0.968225	4.20398	0.639411	1155.39	1	22/30	2
19	gi|118171375|gb|ABK72271.1| ribosomal protein L4/L1 family protein [Mycobacterium smegmatis str. MC2 155]						1.92171e-08	2.8342	30.2102		22884.7	118171375	3 (3 0 0 0 0)
20	gi|166234688|sp|A0QSD2.1|RL4_MYCS2 RecName: Full=50S ribosomal protein L4						1.92171e-08	2.8342	30.2102		22884.7	166234688	3 (3 0 0 0 0)
21	gi|118470417|ref|YP_890305.1| base excision DNA repair protein, HhH-GPD family protein [Mycobacterium smegmatis str. MC2 155]						4.48013e-07	2.69188	30.1855	16.4	31880.2	118470417	3 (3 0 0 0 0)
	7770	R.FALAGEGETGRPA.-	1276.38	0.22594	2	CID	4.48013e-07	0.965991	3.5182	0.540689	1681.41	1	19/24	1
	10174	R.WPTASATAAAGPAEVLR.A	1669.86	0.303746	2	CID	0.00400894	0.886159	3.70935	0.507106	552.163	1	15/32	1
	12857	R.ALDSLLVDGLVEQTADGR.F	1873.05	-0.307417	2	CID	0.00608272	0.839734	3.20888	0.476268	557.746	1	15/34	1
22	gi|118171704|gb|ABK72600.1| base excision DNA repair protein, HhH-GPD family protein [Mycobacterium smegmatis str. MC2 155]						4.48013e-07	2.69188	30.1855		31880.2	118171704	3 (3 0 0 0 0)
23	gi|118471400|ref|YP_885907.1| 50S ribosomal protein L17 [Mycobacterium smegmatis str. MC2 155]						3.87945e-11	1.92192	20.2852	19.1	21854	118471400	2 (2 0 0 0 0)
	10989	R.KGDNAPMAVIELVR.E	1513.79	-1.33386	2	CID	3.87945e-11	0.948069	3.67985	0.471322	896.152	1	20/26	2
	13450	R.LGGSSSHQSALLANLATSLFEHGR.I	2454.68	2.90902	3	CID	6.58719e-07	0.973855	5.70328	0.575424	1732.61	1	34/92	2
24	gi|118172687|gb|ABK73583.1| 50S ribosomal protein L17 [Mycobacterium smegmatis str. MC2 155]						3.87945e-11	1.92192	20.2852		21854	118172687	2 (2 0 0 0 0)
25	gi|166216186|sp|A0QSL9.1|RL17_MYCS2 RecName: Full=50S ribosomal protein L17						3.87945e-11	1.92192	20.2852		21854	166216186	2 (2 0 0 0 0)
